1  
2  
3  
4  
5  
6  
7  
8  
9  
10  
11  
12  
13  
14  
15  
16  
17  
18  
19  
20  
21  
22

Sendai Virus Infection Induces Expression of Novel RNAs in Human Cells

Roli Mandhana, Curt M. Horvath\*

*Department of Molecular Biosciences*

*Northwestern University, Evanston, IL 60208, USA*

\*Corresponding author

Tel: (847) 491-5530

Fax: (847) 491-0848

Email: [horvath@northwestern.edu](mailto:horvath@northwestern.edu)

## 23 **Abstract**

24 Innate antiviral immune responses are driven by virus-induced changes in host gene  
25 expression. While much research on antiviral effectors has focused on virus-inducible  
26 mRNAs, recent genome-wide analyses have identified hundreds of novel target sites for  
27 virus-inducible transcription factors and RNA polymerase. These sites are beyond the  
28 known antiviral gene repertoire and their contribution to innate immune responses is  
29 largely unknown. In this study, RNA-sequencing of mock-infected and Sendai virus-  
30 infected cells was performed to characterize the virus-inducible transcriptome and  
31 identify novel virus-inducible RNAs (nviRNAs). Virus-inducible transcription was  
32 observed throughout the genome resulting in expression of 1755 previously RefSeq-  
33 annotated RNAs and 1545 nviRNAs. The previously-annotated RNAs primarily consist  
34 of protein-coding mRNAs, including several well-known antiviral mRNAs that had low  
35 sequence conservation but were highly virus-inducible. The previously-unannotated  
36 nviRNAs were mostly noncoding RNAs with poor sequence conservation. Independent  
37 analyses of nviRNAs based on infection with Sendai virus, influenza virus, and herpes  
38 simplex virus 1, or direct stimulation with IFN $\alpha$  revealed a range of expression patterns  
39 in various human cell lines. These phylogenetic and expression analyses suggest that  
40 many of the nviRNAs share the high inducibility and low sequence conservation  
41 characteristic of well-known primary antiviral effectors and may represent dynamically  
42 evolving antiviral factors.

43

44

45

## 46 **Introduction**

47 Virus infection of human cells initiates host cell signaling cascades that result in  
48 widespread changes in gene expression. Collectively, these changes produce robust  
49 antiviral responses that form the basis of innate and adaptive immunity<sup>1,2</sup>. Induction of  
50 the immune response depends on recognition of viral components by host pattern  
51 recognition receptors. Though RNA- and DNA-genome viruses are detected by distinct  
52 pattern recognition receptors<sup>3,4</sup>, the cellular response to most virus infections culminates  
53 in the activation of master transcription factors IRF3 and NF- $\kappa$ B.

54

55 The most widely studied virus-induced RNAs encode effector proteins that mediate  
56 virus interference and signal amplification<sup>5</sup>, including several types of interferon (IFN),  
57 antiviral cytokines that are secreted from the infected cells<sup>6</sup>. Type I IFN includes the  
58 single IFN $\beta$ , as well as a number IFN $\alpha$  subtypes that all bind to a common IFN $\alpha/\beta$   
59 receptor<sup>6</sup>; Type II IFN includes the single IFN $\gamma$  that binds to the distinct IFN $\gamma$  receptor<sup>6</sup>;  
60 Type III IFN includes IFN $\lambda$  members, also known as IL-28 and IL-29, that bind to a  
61 distinct IFN $\lambda$  receptor<sup>7</sup>. These receptors activate downstream JAK-STAT signaling<sup>8,9</sup>  
62 and the expression of hundreds of effectors, known as interferon stimulated genes  
63 (ISGs)<sup>10-12</sup>.

64

65 The rise in genome-wide sequencing studies has revealed many previously  
66 unrecognized RNA species including noncoding RNAs with diverse roles in cellular  
67 processes such as gene expression, post-transcriptional regulation, translation, cell  
68 cycle regulation, and immune responses<sup>13-17</sup>. Noncoding RNAs are also increasingly

69 being linked to the cellular response to viruses. For example, BISPR is an IFN $\alpha$ -  
70 induced long noncoding RNA (lncRNA) that regulates the expression of tetherin, a  
71 cellular antiviral factor that blocks viral release<sup>18,19</sup>. NEAT1 is a virus-induced lncRNA  
72 that regulates the expression of antiviral genes such as IL-8<sup>20</sup>. In the case of lncRNA-  
73 ACOD1, expression promotes rather than interferes with virus replication by regulating  
74 cellular metabolism<sup>21</sup>. These examples underscore the importance of deep sequencing  
75 approaches to characterize the extent of noncoding RNA transcription following virus  
76 infections.

77  
78 Our previous study in human cells showed that early responses to RNA-genome virus  
79 infections initiate genome-wide binding of IRF3 and NF- $\kappa$ B to diverse loci to recruit and  
80 activate RNA polymerase II, assemble transcriptional machinery, and induce  
81 transcription<sup>22</sup>. Many of these binding sites were novel virus-inducible sites in intergenic  
82 and intronic regions of the genome, suggesting the existence of novel virus-inducible  
83 RNAs<sup>22</sup>. The identification of these novel binding sites along with the recent increase in  
84 identification of individual novel RNAs with functions related to regulation of virus  
85 infection motivated genome-wide examination of virus-inducible RNAs. In this study,  
86 novel RNA-encoding loci were identified throughout the genome, but unlike most  
87 annotated RNAs, they were primarily expressed from intergenic regions. Analysis of  
88 newly-identified virus-induced RNAs, referred to here as nviRNAs<sup>22</sup>, reveals that they  
89 can be induced by RNA and DNA-genome viruses as well as by direct stimulation with  
90 the type I IFN, IFN $\alpha$ , in both general and cell-specific fashion. These findings expand

91 the extent of virus-induced transcription and suggest that both coding and noncoding  
92 RNA expression are hallmarks of the cellular response to virus infections.

93

## 94 **Results**

### 95 **RNA-sequencing and identification of differentially expressed genes**

96 To fully appreciate the extent of virus-induced RNA transcription, human Namalwa B  
97 cells were infected with Sendai virus, an RNA virus that is a potent inducer of antiviral  
98 signaling<sup>22</sup>. Mock-infected cells and cells infected with 5 plaque forming units (pfu) of  
99 Sendai virus per cell for 6 hours were subjected to paired-end RNA sequencing.  
100 Approximately 200 million reads of 100 bp read length were obtained for each sample.  
101 On an average, 90% of total reads mapped to the human reference genome  
102 (GRCh37/hg19).

103

104 Enrichment of RNAs in mock-infected or virus-infected samples was analysed with the  
105 DESeq2 program, resulting in the identification of 6210 RNAs that were differentially  
106 expressed after virus infection at a false discovery rate (FDR) of 5% and fold change of  
107 at least 1.5. Among these RNAs 3300 were induced by virus infection, while 2910 were  
108 suppressed. The expression changes of representative groups of these RNAs were  
109 confirmed in independent samples by RT-qPCR using primers specific for virus-induced  
110 previously-annotated genes (Fig. 1a) and previously-unannotated RNAs (Fig.1b), as  
111 well as for RNAs suppressed by virus infection (Fig. 1c). In all categories, changes in  
112 RNA abundance levels measured by RT-qPCR closely matched the expression  
113 changes measured in RNA-sequencing analysis.

114

115 The magnitude of differential expression was much less for the suppressed RNAs  
116 compared to the RNAs induced by virus infection. The expression of the most  
117 suppressed RNA, C10orf71, was suppressed only 50-fold by virus infection while the  
118 most induced RNA, IL-29, was induced almost 20,000-fold. More than 480 of the virus-  
119 induced RNAs are induced by more than 50-fold after virus infection. Due to this  
120 discrepancy in range of expression change, further emphasis was placed on analysing  
121 the virus-induced RNAs.

122

123 Of the 3300 virus-induced RNAs, 1755 have an existing RefSeq annotation<sup>23</sup>. The most  
124 highly induced of these annotated RNAs (Table 1) code for proteins known to play key  
125 roles in the cellular response to viruses, including type I IFNs<sup>6</sup> (IFN $\beta$ , IFN $\alpha$ 8, and  
126 IFN $\alpha$ 13), type III IFNs<sup>7</sup> (IL-29, IL-28 $\alpha$  and IL28 $\beta$ ), chemokines<sup>24</sup> (CXCL10 and CXCL11),  
127 the antiviral mediator, OASL<sup>25</sup>, and the antiviral E3 ligase, HERC5<sup>26,27</sup>. In addition, 115  
128 of the 389 previously identified type I ISGs compiled in a recent study<sup>28</sup> were found to  
129 be induced by at least 1.5 fold.

130

### 131 **Gene enrichment analysis**

132 To further characterize these induced RNAs, cellular pathways induced by virus  
133 infection were identified using DAVID Bioinformatics Resources<sup>29,30</sup>, a functional  
134 annotation tool that determines statistically significant gene enrichment in biological  
135 processes from a given gene list. The previously-annotated virus-induced RNAs  
136 mapped to 1608 DAVID gene IDs and were significantly enriched in more than 400

137 Gene Ontology (GO) biological processes and 40 Kyoto Encyclopedia of Genes and  
138 Genomes (KEGG) pathways.

139

140 As expected, the top 10 most enriched GO processes describe cellular functions that  
141 enable the cell to respond to virus infection, including type I IFN and cytokine signaling  
142 (Fig. 2a). The top 10 most enriched KEGG pathways also describe pathways in  
143 response to various RNA viruses such as influenza A virus, measles virus, and hepatitis  
144 C virus, a DNA virus, herpes simplex virus, and several pattern recognition receptor  
145 pathways including toll-like receptor signaling, RIG-I-like receptor signaling, and  
146 cytosolic-DNA sensing (Fig. 2b).

147

148 To better understand the extent of biological processes that are induced after virus  
149 infection, clustering analysis was carried out on all enriched GO biological process  
150 terms. The enriched GO biological processes formed 27 clusters with an enrichment  
151 score above 3, indicating that a majority of the processes within the cluster were  
152 statistically significant (Supplementary Table S1). The top five most enriched clusters  
153 relate to type I IFN signaling, cytokine signaling, type II IFN signaling and the unfolded  
154 protein response. The IFN and cytokine signaling pathways are known to induce  
155 antiviral factors, and the unfolded protein response is a cellular stress response induced  
156 by viral protein translation in the host cell. These analyses show that the previously-  
157 annotated virus-induced RNAs include many factors with known roles in the cellular  
158 response to viruses and that the experimental system used in this study is capable of

159 uncovering proteins and pathways that are known to be important in the response to  
160 viruses.

161

### 162 **Genomic distribution of annotated RNAs and nviRNAs**

163 Among the 3300 virus-induced RNAs there were 1755 previously RefSeq-annotated  
164 RNAs and 1545 novel virus-inducible RNAs (nviRNAs) that were not previously RefSeq-  
165 annotated. The previously-annotated RNAs and the identified nviRNAs were found to  
166 be widely distributed among all the chromosomes (Fig. 3a), but the nviRNAs differed  
167 from the known RNAs in their distribution among specific genomic features (Fig. 3b).  
168 Examination of six genomic feature categories, including: promoters, transcriptional  
169 termination sites, coding exons, introns, intergenic regions and untranslated regions  
170 (UTRs; includes 5' and 3' UTRs), revealed the majority of annotated RNAs mapped to  
171 coding exons (87.6%; Fig. 3b) with fewer than 10% mapping to introns and intergenic  
172 regions, indicating that the annotations largely reflect mRNA-encoding genes. In  
173 contrast, only 1.7% of the nviRNAs mapped to coding exons while more than 90%  
174 mapped to introns or intergenic regions. The finding that most nviRNAs are transcribed  
175 from intronic and intergenic regions is consistent with previous work showing abundant  
176 virus-induced RNA polymerase II binding and elongation throughout intronic and  
177 intergenic regions<sup>22</sup>.

178

### 179 **Protein coding and conservation analysis of annotated RNAs and nviRNAs**

180 To compare the protein coding potential of the virus-induced RNAs, a PhyloCSF score  
181 was calculated for each RNA. PhyloCSF is a method that uses a multi-species



182 sequence alignment to calculate a score reflecting the likelihood that an open reading  
183 frame (ORF) encodes a protein<sup>31</sup>. Analysis of previously characterized RNAs has  
184 shown that known noncoding RNAs generally score below 50 while protein-coding  
185 genes score above 50<sup>32,33</sup>.

186

187 There were 10 previously-annotated RNAs and 20 nviRNAs that did not have an ORF  
188 and were excluded from this analysis. The remaining 3270 RNAs were analysed and  
189 plotted in Fig. 4. Results indicate that the majority of the known RNAs (77.6%, Fig. 4a)  
190 were predicted to be protein coding mRNAs, while only 4.2% of the nviRNAs were  
191 predicted to encode a protein (Fig. 4a). Similar results were seen when limiting to  
192 RNAs induced at least 5-fold by virus infection (Supplementary Fig. S1). Of the  
193 previously-annotated RNAs, 69.6% were predicted to encode a protein while only 2.2%  
194 of the nviRNAs were likely to be protein coding. However, for both the previously-  
195 annotated RNAs and the nviRNAs, a larger proportion of the RNAs mapping to exonic  
196 genomic features had a high PhyloCSF score (Fig. 4b-c). For the annotated RNAs,  
197 87% of the RNAs mapping to exons had a PhyloCSF score greater than 50 (Fig. 4b).  
198 Similarly, 52% of the nviRNAs mapping to exons had a PhyloCSF score above 50 (Fig.  
199 4c). These results indicate that the nviRNAs are mostly virus-inducible noncoding  
200 RNAs, but there are 64 nviRNAs that were identified to have protein-coding potential.

201

202 Though the nviRNAs are mostly noncoding RNAs, they may nevertheless have  
203 important functions in the antiviral system. Sequence conservation among vertebrates  
204 is frequently used to determine functional capacity of RNAs. However, many immune

205 genes have undergone positive, diversifying selection and are therefore poorly  
206 conserved. Lower sequence conservation in virus-inducible genes may be indicative of  
207 an important antiviral role.

208

209 Sequence conservation among vertebrates was calculated by PhastCons, which uses a  
210 multiple-species alignment to calculate a score for each nucleotide corresponding to the  
211 probability that it is within a conserved element<sup>34</sup>. To determine average sequence  
212 conservation across vertebrates, the mean PhastCons score for each RNA was  
213 calculated. Overall, the previously-annotated RNAs had much higher sequence  
214 conservation than the nviRNAs (Fig. 4d). While only 50% of the previously-annotated  
215 RNAs had a score of 0.413 or less, 98% of the nviRNAs had a score of 0.410 or less,  
216 indicating that their sequences were much less conserved than the annotated RNAs.  
217 The maximum mean PhastCons score for a nviRNA was 0.687, whereas there were 24  
218 previously-annotated RNAs with scores of 0.9 or higher, suggesting that the nviRNAs  
219 on average represent a novel evolving group of RNAs.

220

221 Comparison of the PhastCons score with virus-inducibility revealed that the most highly  
222 induced previously-annotated RNAs were not highly conserved among vertebrates, in  
223 accordance with these genes having evolved under positive selection (Fig. 4e, blue  
224 circles). When limiting to RNAs induced at least 5-fold by virus infection, 50% of the  
225 previously-annotated RNAs had a score less than 0.343 (Supplementary Fig. S2). The  
226 top 10 most up-regulated annotated RNAs all had a mean PhastCons score under 0.5,  
227 with the top 5 having a score under 0.3 (Fig. 4e; Table 1). As there were examples of

228 highly-induced nviRNAs that were similarly poorly conserved (Fig. 4f), it is anticipated  
229 that at least a fraction of these nviRNAs could have novel functions in the response to  
230 viruses.

231

### 232 **Inducibility of nviRNAs in other conditions**

233 Most of the well-known antiviral genes, including type I IFNs, are broad-acting effectors  
234 that are widely induced by diverse viruses and in most cell types. However, there are  
235 some antiviral genes that have more restricted antiviral activity<sup>28</sup>.

236

237 To determine whether nviRNAs are activated in contexts other than Sendai virus  
238 infection, a subset of the nviRNAs were screened in Namalwa cells to determine  
239 whether their expression could also be induced by infection with two viruses identified  
240 through the KEGG pathways (Fig. 2): a distinct RNA-genome virus, influenza A virus  
241 (A/Udorn/72) and a DNA-genome virus, HSV-1. In addition, cells were subjected to  
242 direct stimulation with type I IFN (IFN $\alpha$ ). Cells were either infected with 5 pfu/cell of  
243 virus for 10 hours or treated with 1000 U/mL IFN $\alpha$  for 6 hours prior to RNA isolation for  
244 gene expression analysis by RT-qPCR with gene-specific primers. The known virus-  
245 induced genes IFIT1<sup>35</sup>, IFN $\beta$ <sup>6</sup>, CSAG3 and USP18<sup>36</sup> were used as controls. This  
246 analysis revealed great variation in the inducibility of the nviRNAs, not only in which  
247 stimuli induced them, but also in the level of induction (Fig. 5; Supplementary Table S2).  
248 Using a 2-fold increase in expression as a minimum for induction, the nviRNAs were  
249 classified into one of eight clusters based on their behavior (Fig. 5): (1) inducible by  
250 viruses and IFN $\alpha$ , (2) inducible by viruses only, (3) inducible by RNA-viruses and IFN $\alpha$ ,

251 (4) inducible by RNA viruses only, (5) inducible by Sendai virus and HSV-1 as well as  
252 IFN $\alpha$ , (6) inducible by both Sendai virus and HSV-1, (7) inducible by Sendai virus and  
253 IFN $\alpha$ , and (8) inducible by influenza A virus or HSV-1. The nviRNAs that were inducible  
254 by multiple viruses and IFN $\alpha$  may represent type I ISGs that are broad-acting novel  
255 antiviral effectors, while the nviRNAs induced by a subset of stimuli may represent  
256 restricted antiviral effectors.

257

258 To investigate the cell-specificity of these nviRNA transcriptional responses, the  
259 inducibility after virus infection and IFN $\alpha$  stimulation was also examined in several other  
260 human cell types. The epithelial 2fTGH cells and monocyte THP-1 cells were infected  
261 with 5 pfu/cell of Sendai virus (for 4 hours due to cytopathic effects) or influenza A virus  
262 (10 hours) or directly treated with IFN $\alpha$  (6 hours). THP-1 cells were also infected with 5  
263 pfu/cell of HSV-1 (10 hours). In 2fTGH cells, transfection of the synthetic dsRNA,  
264 poly(I:C), an IFN activator that can robustly induce the expression of IFNs and ISGs,  
265 was included as a stimulus. The known virus-induced genes IFN $\beta$ <sup>6</sup>, IFIT1<sup>35</sup>, CSAG3  
266 and USP18<sup>36</sup> were expressed in both 2fTGH cells (Fig. 6a) and THP-1 cells (Fig. 7a) by  
267 various stimuli. The 6 nviRNAs identified as most likely to be broad-acting antiviral  
268 effectors in the Namalwa cells screen were also induced in both 2fTGH cells (Fig. 6b)  
269 and THP-1 cells (Fig. 7b). In 2fTGH cells, all the tested nviRNAs were induced by  
270 poly(I:C), though XLOC\_035959 was induced less than 2-fold (Fig. 6b). Expression of  
271 the other 5 nviRNAs was also up-regulated more than 2-fold by influenza A virus. In  
272 THP-1 cells, influenza A virus robustly induced all 6 nviRNAs (Fig. 7b), with HSV-1 and  
273 IFN $\alpha$  also inducing half of the tested nviRNAs. The expression of the nviRNAs in the

274 cluster only inducible by viruses in Namalwa cells was also tested in other cell types.  
275 There was greater variability in the inducibility of these nviRNAs. There were 6  
276 nviRNAs induced in both 2fTGH cells (Fig. 6c) and THP-1 cells (Fig. 7c) by 10 hours of  
277 influenza A virus infection, while the other 5 nviRNAs showed more varied induction  
278 (Table 2).

279

280 The expression level and induction of each nviRNA varied greatly depending on the  
281 inducing stimulus, likely due to differences in the activation kinetics or intensity of each  
282 stimulus. Of the 12 nviRNAs expressed in both 2fTGH cells and THP-1 cells, 10  
283 nviRNAs were also expressed in the epithelial HeLa and A549 cells (Table 2,  
284 Supplementary Table S3). The expression of these nviRNAs by at least 1 stimulus, and  
285 in most cases more than 1 stimulus, in multiple cell types demonstrates that these  
286 nviRNAs are not cell-specific and are candidates for antiviral function.

287

## 288 **Discussion**

289 In this study, RNA-sequencing of Namalwa cells mock-infected or infected with Sendai  
290 virus identified 1755 previously RefSeq-annotated RNAs and 1545 novel virus-inducible  
291 RNAs (nviRNAs). Analysis of these virus-inducible RNAs revealed insights into the  
292 previously unrecognized depth and breadth of the virus-inducible transcriptome, and  
293 identified nviRNAs as possible targets of positive selection in the cellular response to  
294 viruses.

295

296 This study was motivated in part by the identification of novel virus-inducible binding  
297 sites for the antiviral transcription factors IRF3 and NF- $\kappa$ B, and RNA polymerase II<sup>22</sup>.  
298 Based on the RNA polymerase II binding sites, 1450 nviRNAs were predicted to be  
299 expressed<sup>22</sup>. Using the same cell line and virus for infection, 501 of these predicted  
300 nviRNAs were partially matched to RNAs identified in RNA-sequencing analysis.  
301 Factors that may contribute to this apparent disparity include timing, abundance and  
302 methodology. Furthermore, most of these RNAs were excluded from further analysis  
303 due to their low expression levels. Nevertheless, since many noncoding RNAs have  
304 low expression levels<sup>37</sup>, the subset of functional nviRNAs may extend past the 1545  
305 nviRNAs analysed in this study.

306

307 Though both previously-annotated RNAs and nviRNAs were distributed similarly across  
308 the chromosomes (Fig. 3a), there was a significant difference in the genomic features  
309 associated with these different loci. More than 80% of the previously-annotated RNAs  
310 were transcribed from exons, whereas more than 80% of the nviRNAs were transcribed  
311 from intergenic regions (Fig. 3b). Even when limiting to RNAs with a high PhyloCSF  
312 score, indicating a strong likelihood that the RNA encodes a protein, 96.4% of the  
313 previously-annotated RNAs and only 21.8% of the nviRNAs mapped to exons. This  
314 discrepancy highlights that current annotations of genomic features are based on  
315 identification of a relatively small number of RNAs and the labeling of most of the  
316 genome as intergenic “junk” DNA. The recent expansion in sequencing studies that  
317 identify novel RNAs indicates a need for a corresponding refinement in annotations of  
318 genomic features.

319

320 The protein coding potential and functionality of the virus-inducible RNAs was assessed  
321 using PhyloCSF and PhastCons respectively. A majority of the previously RefSeq-  
322 annotated RNAs were identified as protein coding mRNAs, while very few of the  
323 nviRNAs were found likely to encode a protein (Fig. 4). The mean PhastCons score of  
324 each RNA was used to determine its average conservation. Though the previously-  
325 annotated RNAs vary in their mean PhastCons score, the most highly inducible, well-  
326 known RNAs that encode antiviral factors had a PhastCons score below 0.5 (Fig. 4e;  
327 Table 1), indicating low conservation may be suggestive of positive selection and overall  
328 importance to the cellular response to viruses.

329

330 While most genes have undergone negative selection to be conserved through  
331 evolution, many immune genes have been positively selected for diversity<sup>38,39</sup>. Virus  
332 evolution to overcome host antiviral immunity creates a potent selective force for  
333 diversification of key antiviral effectors. The cyclical virus-host interplay has resulted in  
334 immune genes being among the more recently evolved and more diversified genes in  
335 the human genome<sup>40</sup>. The poor sequence conservation of the highly induced nviRNAs  
336 may indicate that they are previously unidentified antiviral factors that evolved under  
337 positive selection.

338

339 In further support of this concept of nviRNA functionality, expression of a subset of  
340 nviRNAs was analysed and found to be induced, albeit variably, by different RNA and  
341 DNA viruses, and antiviral stimulation with poly(I:C) and IFN $\alpha$ . Differences in both

342 expression and temporal regulation were observed among the nviRNAs tested due to  
343 specific virus or treatment, as well as in the cellular host cell line. It is reasonable to  
344 speculate that at least some of the nviRNAs, particularly the 10 expressed in 5 different  
345 cell lines tested (Fig. 5, Table 2), could represent novel antiviral factors with unique  
346 roles in the cellular innate immune response to viruses. This expression analysis does  
347 not assign any specific function to these novel RNAs, but their identification and  
348 classification is the first step in understanding their roles in the cellular response to virus  
349 infections. A loss of function analysis should be conducted for the nviRNAs that were  
350 classified as inducible in multiple cell lines to determine their function.

351

352 This study focused on identifying nviRNAs with potential functions in the cellular  
353 response to viruses; however, it is worthwhile to also examine potential novel antiviral  
354 factors among the previously RefSeq-annotated RNAs. Many of these RNAs encode  
355 known antiviral genes that are enriched in critical antiviral biological processes, but not  
356 all of the annotated RNAs have been assigned an antiviral function. Of the 1755  
357 previously-annotated virus-induced RNAs, 328 were not assigned to any GO biological  
358 process, indicating that they are poorly characterized functionally. Additionally, there  
359 are many RNAs that despite being assigned a GO biological process, were not  
360 previously identified as virus-inducible RNAs. Combining these previously-annotated,  
361 virus-inducible RNAs with the nviRNAs identifies a large pool of potential antiviral  
362 responders that could have untapped value as antiviral diagnostic or therapeutic tools.

363

## 364 **Materials and Methods**



365 *Cells, Viruses, and Treatments*

366 Namalwa B cells (ATCC CRL-1432) and THP-1 cells (ATCC TIB-202) were cultured in  
367 RPMI 1640 Medium (Life Technologies, Thermo Fisher Scientific). HeLa cells (ATCC  
368 CCL-2), A549 cells (ATCC CCL-185) and 2fTGH cells (ECACC 12021508) were  
369 cultured in Dulbecco's Modified Eagle Medium (Life Technologies, Thermo Fisher  
370 Scientific). For all cell lines medium was supplemented with 10% Cosmic calf serum  
371 (HyClone, GE Healthcare Life Sciences) and 1% Penicillin-Streptomycin (Gibco,  
372 Thermo Fisher Scientific). Sendai virus (Cantell strain) was grown in embryonated  
373 chicken eggs, and titers were determined on Vero cells. The A/Udorn/72 strain of  
374 influenza virus (gift of R. A. Lamb, Northwestern University) was propagated and titer  
375 was determined on MDCK cells. HSV-1 (F strain) (gift of G. A. Smith, Northwestern  
376 University) was propagated and titer was determined on Vero cells. Cells were infected  
377 at a multiplicity of infection (MOI) of 5 for indicated times. Virus infections were  
378 performed in serum-free medium (SFM), with 1% bovine serum albumin (BSA)  
379 supplemented for influenza virus. At 1 hour post-infection, the inoculation medium was  
380 replaced with medium containing 2% serum for the remainder of the infection. For  
381 poly(I:C) transfection, 2.5 µg/mL of low and high molecular weight poly(I:C) (Invivogen)  
382 was transfected for 6 hours using the Lipofectamine 2000 (Invitrogen, Thermo Fisher  
383 Scientific) transfection reagent. For direct treatment with IFN $\alpha$ , cells were treated with  
384 1000 U/mL recombinant IFN $\alpha$  (Roche).

385

386 *Total RNA Extraction*

387 Total RNA was extracted using the TRIzol Reagent (Invitrogen, Thermo Fisher  
388 Scientific) and treated with DNase I (Invitrogen, Thermo Fisher Scientific). The RNA  
389 quantity was obtained using NanoDrop 2000 (Thermo Fisher Scientific). For RNA used  
390 in RNA sequencing, the integrity was examined by the Bioanalyser 2100 system  
391 (Agilent Technologies) to obtain RNA Integrity Number (RIN) of over 9.

392

### 393 *RNA sequencing and transcript assembly*

394 Duplicate samples of mock-infected and Sendai virus-infected cells for 6 hours were  
395 used to prepare RNA libraries for sequencing on Illumina HiSeq2000 platform (Illumina)  
396 to generate 100 bp paired-end sequencing reads. Raw data was filtered to remove  
397 adapter sequences and low-quality reads. The remaining rRNA reads were removed by  
398 mapping to known human rRNA sequences. The clean, high-quality data was mapped  
399 to the human reference genome (GRCh37.p10/hg19)<sup>41</sup> using TopHat<sup>42</sup> (2.0.10). The  
400 mapped reads for each sample were independently assembled into annotated and  
401 novel transcripts using the Cufflinks<sup>43</sup> (2.1.1) suite of programs.

402

### 403 *Bioinformatic analysis*

404 To determine differential expression between mock-infected and Sendai virus-infected  
405 samples, read counts for each RNA were generated by HTSeq<sup>44</sup> (0.6.0) for each  
406 sample and analysed by the DESeq2<sup>45</sup> (1.2.10) program. Significance was calculated  
407 using the Wald test and a Benjamini-Hochberg False Discovery Rate cut-off of 5% was  
408 used to assess statistically significantly differential expression. The lowest quartile of  
409 RNAs based on expression were excluded from further analysis. RefSeq genomic

410 feature distribution information for coding exons, introns, 3' and 5' untranslated regions  
411 (UTRs), promoters (-1kb), and transcription termination sites (+1 kb) was downloaded  
412 from the UCSC genome browser (<http://genome.ucsc.edu/>)<sup>23</sup> and analysed using the  
413 BEDtools program<sup>46</sup>. The online functional annotation tool, DAVID<sup>29,30</sup> (6.8), was used  
414 to conduct gene enrichment analysis. A list of gene symbols corresponding to  
415 differentially expressed RNAs was mapped to DAVID gene IDs to determine which  
416 Gene Ontology biological processes and KEGG pathways were enriched. A Benjamini-  
417 Hochberg False Discovery Rate cut-off of 5% was used to assess statistical  
418 significance. Clustering analysis of enriched GO biological processes was done using  
419 DAVID's heuristic fuzzy multiple-linkage partitioning method<sup>47</sup>. An enrichment score  
420 cut-off of 3 was used to determine significance. Base-by-base PhastCons<sup>34</sup>  
421 conservation score across 100 vertebrates were downloaded from the UCSC Genome  
422 Browser. For each RNA a mean score was calculated if there was a score available for  
423 at least 80% of the bases in the sequence. The PhyloCSF<sup>31</sup> software was locally  
424 installed and used to determine the coding potential of the longest start-to-stop open  
425 reading frame in each RNA. The multiple-species alignments needed for this analysis  
426 were prepared on Galaxy web platform at [usegalaxy.org](http://usegalaxy.org)<sup>48</sup>.

427

#### 428 *cDNA synthesis and Quantitative PCR*

429 Purified total RNA was random primed and reverse transcribed using SuperScript III  
430 Reverse Transcriptase (Invitrogen, Thermo Fisher Scientific). Gene expression was  
431 measured by quantitative real-time PCR (qPCR) and normalized to glyceraldehyde 3-  
432 phosphate dehydrogenase (GAPDH) to determine relative abundance by the  $2^{-\Delta C_T}$

433 method or fold change over mock by the  $2^{-\Delta\Delta C_T}$  method<sup>49</sup>. Primers are listed in  
434 Supplementary Table S4.

435

#### 436 *Data Availability*

437 RNA-sequencing data is available in the GEO database under study GSE115266.

438

#### 439 **References**

440 1 Mogensen, T. H. Pathogen recognition and inflammatory signaling in innate  
441 immune defenses. *Clin Microbiol Rev* **22**, 240-273, Table of Contents,  
442 doi:10.1128/CMR.00046-08 (2009).

443 2 Takeuchi, O. & Akira, S. Innate immunity to virus infection. *Immunol Rev* **227**, 75-  
444 86, doi:10.1111/j.1600-065X.2008.00737.x (2009).

445 3 Kawasaki, T. & Kawai, T. Toll-like receptor signaling pathways. *Front Immunol* **5**,  
446 461, doi:10.3389/fimmu.2014.00461 (2014).

447 4 Bruns, A. M. & Horvath, C. M. Antiviral RNA recognition and assembly by RLR  
448 family innate immune sensors. *Cytokine Growth Factor Rev* **25**, 507-512,  
449 doi:10.1016/j.cytogfr.2014.07.006 (2014).

450 5 Sadler, A. J. & Williams, B. R. Interferon-inducible antiviral effectors. *Nat Rev*  
451 *Immunol* **8**, 559-568, doi:10.1038/nri2314 (2008).

452 6 Stark, G. R., Kerr, I. M., Williams, B. R., Silverman, R. H. & Schreiber, R. D. How  
453 cells respond to interferons. *Annu Rev Biochem* **67**, 227-264,  
454 doi:10.1146/annurev.biochem.67.1.227 (1998).

- 455 7 Ank, N., West, H. & Paludan, S. R. IFN-lambda: novel antiviral cytokines. *J*  
456 *Interferon Cytokine Res* **26**, 373-379, doi:10.1089/jir.2006.26.373 (2006).
- 457 8 Fu, X. Y., Kessler, D. S., Veals, S. A., Levy, D. E. & Darnell, J. E., Jr. ISGF3, the  
458 transcriptional activator induced by interferon alpha, consists of multiple  
459 interacting polypeptide chains. *Proc Natl Acad Sci U S A* **87**, 8555-8559 (1990).
- 460 9 Kessler, D. S., Veals, S. A., Fu, X. Y. & Levy, D. E. Interferon-alpha regulates  
461 nuclear translocation and DNA-binding affinity of ISGF3, a multimeric  
462 transcriptional activator. *Genes Dev* **4**, 1753-1765 (1990).
- 463 10 Levy, D. E., Kessler, D. S., Pine, R., Reich, N. & Darnell, J. E., Jr. Interferon-  
464 induced nuclear factors that bind a shared promoter element correlate with  
465 positive and negative transcriptional control. *Genes Dev* **2**, 383-393 (1988).
- 466 11 Reich, N. *et al.* Interferon-induced transcription of a gene encoding a 15-kDa  
467 protein depends on an upstream enhancer element. *Proc Natl Acad Sci U S A*  
468 **84**, 6394-6398 (1987).
- 469 12 Der, S. D., Zhou, A., Williams, B. R. & Silverman, R. H. Identification of genes  
470 differentially regulated by interferon alpha, beta, or gamma using oligonucleotide  
471 arrays. *Proc Natl Acad Sci U S A* **95**, 15623-15628 (1998).
- 472 13 Rinn, J. L. & Chang, H. Y. Genome regulation by long noncoding RNAs. *Annu*  
473 *Rev Biochem* **81**, 145-166, doi:10.1146/annurev-biochem-051410-092902  
474 (2012).
- 475 14 Guttman, M. & Rinn, J. L. Modular regulatory principles of large non-coding  
476 RNAs. *Nature* **482**, 339-346, doi:10.1038/nature10887 (2012).

- 477 15 Yoon, J. H., Abdelmohsen, K. & Gorospe, M. Posttranscriptional gene regulation  
478 by long noncoding RNA. *J Mol Biol* **425**, 3723-3730,  
479 doi:10.1016/j.jmb.2012.11.024 (2013).
- 480 16 Fitzgerald, K. A. & Caffrey, D. R. Long noncoding RNAs in innate and adaptive  
481 immunity. *Curr Opin Immunol* **26**, 140-146, doi:10.1016/j.coi.2013.12.001 (2014).
- 482 17 Djebali, S. *et al.* Landscape of transcription in human cells. *Nature* **489**, 101-108,  
483 doi:10.1038/nature11233 (2012).
- 484 18 Barriocanal, M., Carnero, E., Segura, V. & Fortes, P. Long Non-Coding RNA  
485 BST2/BISPR is Induced by IFN and Regulates the Expression of the Antiviral  
486 Factor Tetherin. *Front Immunol* **5**, 655, doi:10.3389/fimmu.2014.00655 (2014).
- 487 19 Kambara, H. *et al.* Regulation of Interferon-Stimulated Gene BST2 by a lncRNA  
488 Transcribed from a Shared Bidirectional Promoter. *Front Immunol* **5**, 676,  
489 doi:10.3389/fimmu.2014.00676 (2014).
- 490 20 Imamura, K. *et al.* Long noncoding RNA NEAT1-dependent SFPQ relocation  
491 from promoter region to paraspeckle mediates IL8 expression upon immune  
492 stimuli. *Mol Cell* **53**, 393-406, doi:10.1016/j.molcel.2014.01.009 (2014).
- 493 21 Wang, P., Xu, J., Wang, Y. & Cao, X. An interferon-independent lncRNA  
494 promotes viral replication by modulating cellular metabolism. *Science* **358**, 1051-  
495 1055, doi:10.1126/science.aao0409 (2017).
- 496 22 Freaney, J. E., Kim, R., Mandhana, R. & Horvath, C. M. Extensive cooperation of  
497 immune master regulators IRF3 and NFkappaB in RNA Pol II recruitment and  
498 pause release in human innate antiviral transcription. *Cell Rep* **4**, 959-973,  
499 doi:10.1016/j.celrep.2013.07.043 (2013).

- 500 23 Karolchik, D. *et al.* The UCSC Genome Browser database: 2014 update. *Nucleic*  
501 *Acids Res* **42**, D764-770, doi:10.1093/nar/gkt1168 (2014).
- 502 24 Groom, J. R. & Luster, A. D. CXCR3 ligands: redundant, collaborative and  
503 antagonistic functions. *Immunol Cell Biol* **89**, 207-215, doi:10.1038/icb.2010.158  
504 (2011).
- 505 25 Zhu, J., Ghosh, A. & Sarkar, S. N. OASL-a new player in controlling antiviral  
506 innate immunity. *Curr Opin Virol* **12**, 15-19, doi:10.1016/j.coviro.2015.01.010  
507 (2015).
- 508 26 Wong, J. J., Pung, Y. F., Sze, N. S. & Chin, K. C. HERC5 is an IFN-induced  
509 HECT-type E3 protein ligase that mediates type I IFN-induced ISGylation of  
510 protein targets. *Proc Natl Acad Sci U S A* **103**, 10735-10740,  
511 doi:10.1073/pnas.0600397103 (2006).
- 512 27 Dastur, A., Beaudenon, S., Kelley, M., Krug, R. M. & Huibregtse, J. M. Herc5, an  
513 interferon-induced HECT E3 enzyme, is required for conjugation of ISG15 in  
514 human cells. *J Biol Chem* **281**, 4334-4338, doi:10.1074/jbc.M512830200 (2006).
- 515 28 Schoggins, J. W. *et al.* A diverse range of gene products are effectors of the type  
516 I interferon antiviral response. *Nature* **472**, 481-485, doi:10.1038/nature09907  
517 (2011).
- 518 29 Huang da, W., Sherman, B. T. & Lempicki, R. A. Bioinformatics enrichment tools:  
519 paths toward the comprehensive functional analysis of large gene lists. *Nucleic*  
520 *Acids Res* **37**, 1-13, doi:10.1093/nar/gkn923 (2009).

- 521 30 Huang da, W., Sherman, B. T. & Lempicki, R. A. Systematic and integrative  
522 analysis of large gene lists using DAVID bioinformatics resources. *Nat Protoc* **4**,  
523 44-57, doi:10.1038/nprot.2008.211 (2009).
- 524 31 Lin, M. F., Jungreis, I. & Kellis, M. PhyloCSF: a comparative genomics method to  
525 distinguish protein coding and non-coding regions. *Bioinformatics* **27**, i275-282,  
526 doi:10.1093/bioinformatics/btr209 (2011).
- 527 32 Guttman, M. *et al.* Ab initio reconstruction of cell type-specific transcriptomes in  
528 mouse reveals the conserved multi-exonic structure of lincRNAs. *Nat Biotechnol*  
529 **28**, 503-510, doi:10.1038/nbt.1633 (2010).
- 530 33 Guttman, M., Russell, P., Ingolia, N. T., Weissman, J. S. & Lander, E. S.  
531 Ribosome profiling provides evidence that large noncoding RNAs do not encode  
532 proteins. *Cell* **154**, 240-251, doi:10.1016/j.cell.2013.06.009 (2013).
- 533 34 Siepel, A. *et al.* Evolutionarily conserved elements in vertebrate, insect, worm,  
534 and yeast genomes. *Genome Res* **15**, 1034-1050, doi:10.1101/gr.3715005  
535 (2005).
- 536 35 Pichlmair, A. *et al.* IFIT1 is an antiviral protein that recognizes 5'-triphosphate  
537 RNA. *Nat Immunol* **12**, 624-630, doi:10.1038/ni.2048 (2011).
- 538 36 Porritt, R. A. & Hertzog, P. J. Dynamic control of type I IFN signalling by an  
539 integrated network of negative regulators. *Trends Immunol* **36**, 150-160,  
540 doi:10.1016/j.it.2015.02.002 (2015).
- 541 37 Derrien, T. *et al.* The GENCODE v7 catalog of human long noncoding RNAs:  
542 analysis of their gene structure, evolution, and expression. *Genome Res* **22**,  
543 1775-1789, doi:10.1101/gr.132159.111 (2012).



- 544 38 Daugherty, M. D. & Malik, H. S. Rules of engagement: molecular insights from  
545 host-virus arms races. *Annu Rev Genet* **46**, 677-700, doi:10.1146/annurev-genet-  
546 110711-155522 (2012).
- 547 39 Meyerson, N. R. & Sawyer, S. L. Two-stepping through time: mammals and  
548 viruses. *Trends Microbiol* **19**, 286-294, doi:10.1016/j.tim.2011.03.006 (2011).
- 549 40 Kosiol, C. *et al.* Patterns of positive selection in six Mammalian genomes. *PLoS*  
550 *Genet* **4**, e1000144, doi:10.1371/journal.pgen.1000144 (2008).
- 551 41 Lander, E. S. *et al.* Initial sequencing and analysis of the human genome. *Nature*  
552 **409**, 860-921, doi:10.1038/35057062 (2001).
- 553 42 Trapnell, C., Pachter, L. & Salzberg, S. L. TopHat: discovering splice junctions  
554 with RNA-Seq. *Bioinformatics* **25**, 1105-1111, doi:10.1093/bioinformatics/btp120  
555 (2009).
- 556 43 Trapnell, C. *et al.* Transcript assembly and quantification by RNA-Seq reveals  
557 unannotated transcripts and isoform switching during cell differentiation. *Nat*  
558 *Biotechnol* **28**, 511-515, doi:10.1038/nbt.1621 (2010).
- 559 44 Anders, S., Pyl, P. T. & Huber, W. HTSeq--a Python framework to work with  
560 high-throughput sequencing data. *Bioinformatics* **31**, 166-169,  
561 doi:10.1093/bioinformatics/btu638 (2015).
- 562 45 Love, M. I., Huber, W. & Anders, S. Moderated estimation of fold change and  
563 dispersion for RNA-seq data with DESeq2. *Genome Biol* **15**, 550,  
564 doi:10.1186/s13059-014-0550-8 (2014).

- 565 46 Quinlan, A. R. & Hall, I. M. BEDTools: a flexible suite of utilities for comparing  
566 genomic features. *Bioinformatics* **26**, 841-842, doi:10.1093/bioinformatics/btq033  
567 (2010).
- 568 47 Huang, D. W. *et al.* The DAVID Gene Functional Classification Tool: a novel  
569 biological module-centric algorithm to functionally analyze large gene lists.  
570 *Genome Biol* **8**, R183, doi:10.1186/gb-2007-8-9-r183 (2007).
- 571 48 Afgan, E. *et al.* The Galaxy platform for accessible, reproducible and  
572 collaborative biomedical analyses: 2016 update. *Nucleic Acids Res* **44**, W3-W10,  
573 doi:10.1093/nar/gkw343 (2016).
- 574 49 Schmittgen, T. D. & Livak, K. J. Analyzing real-time PCR data by the comparative  
575 C(T) method. *Nat Protoc* **3**, 1101-1108 (2008).

576

## 577 **Acknowledgements**

578 This work was supported by the Northwestern University NUSeq Core Facility, High  
579 Throughput Analysis Laboratory and Quest High Performance Computing Facility. We  
580 are grateful to Adam J. Hockenberry and members of the Horvath lab for critical  
581 comments and helpful suggestions, and to Dr. Christian Stehlik and Dr. Lucia Maria de  
582 Almeida for providing THP-1 cells. Supported by NIH grants AI073919, AI50707, and  
583 GM111652 to C.M.H. R.M. was supported by a pre-doctoral fellowship from the NIH  
584 Training Program in Viral Replication T32AI60523.

585

## 586 **Author Contributions**

587 R.M. and C.M.H. designed the study and wrote the manuscript; R.M. conducted the  
588 experiments and analysis. All authors read and approved the final manuscript.

589

## 590 **Additional Information**

591 **Competing Interests:** The authors declare that they have no competing interests.

592 **Accession codes:** RNA-sequencing data is available in the GEO database under study

593 GSE115266.

594 **Figures & Tables**

595

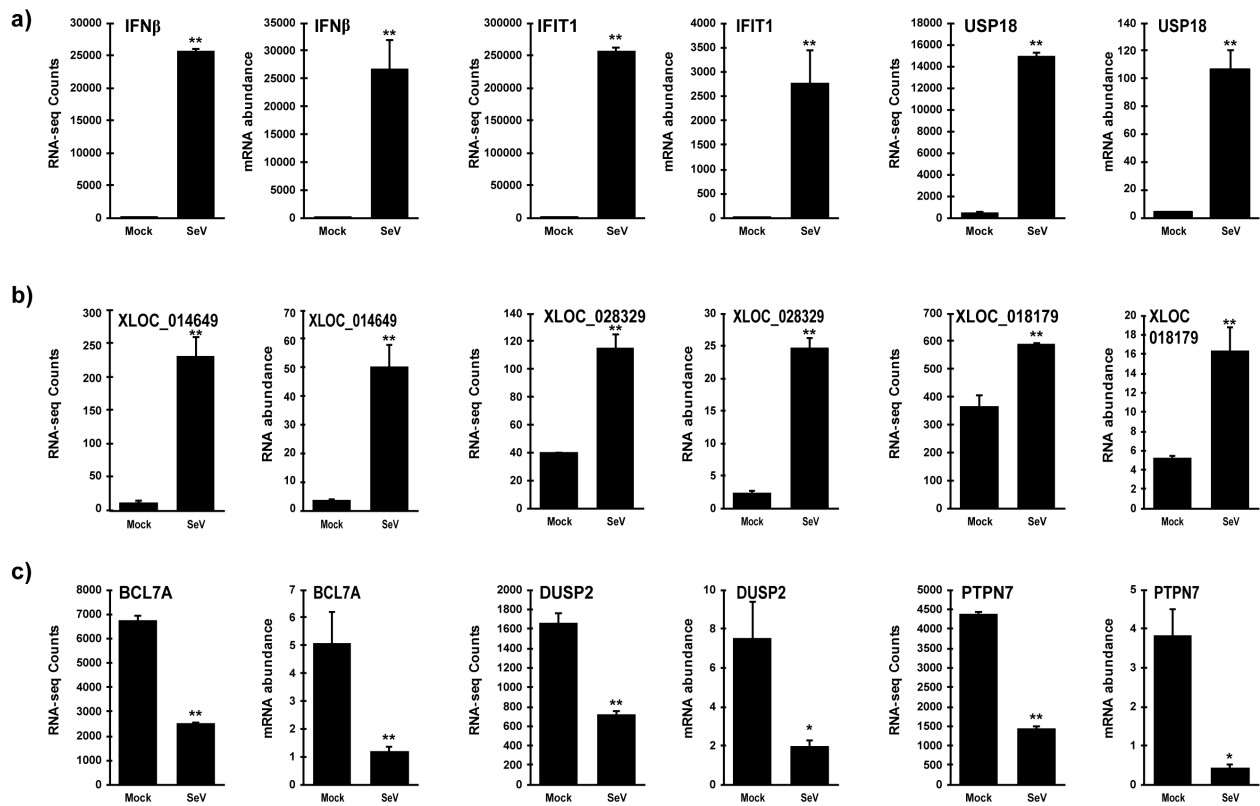

596

597 **Figure 1 - Validation of differential gene expression induced by Sendai virus**  
598 **infection.**

599 Namalwa cells were infected with Sendai virus for 6 hours and total RNA was analyzed  
600 by RNA-sequencing or by RT-qPCR in independent samples. For each indicated RNA,  
601 RNA-sequencing counts are plotted on the graph on the left and RNA abundance from  
602 RT-qPCR on the right. Expression of virus-induced a) previously-annotated genes and  
603 b) previously-unannotated RNAs and c) virus-suppressed genes was validated. RNA  
604 abundance data is representative of  $\geq 2$  replicate experiments and is shown normalized  
605 to GAPDH expression. Bars indicate average values of technical replicates (n=3) with

606 error bars representing standard deviation. Statistical analysis was done using a two-  
607 tailed Student's *t*-test for RT-qPCR measurements (\* p-value < 0.05, \*\* p-value < 0.005)  
608

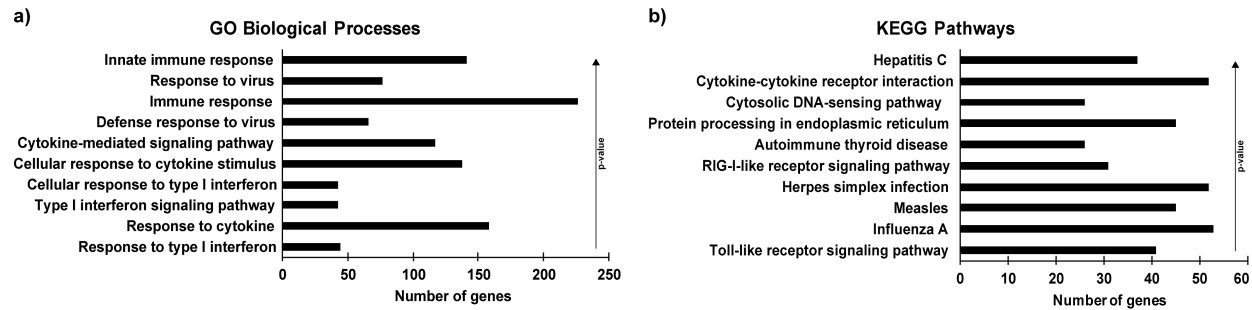

609

610 **Figure 2 - Graphical representation of functional enrichment analysis of Sendai**  
611 **virus-induced RNAs.**

612 Sendai virus-induced previously-annotated RNAs were analysed using DAVID to  
613 determine enriched a) GO biological processes and b) KEGG pathways. The top 10  
614 most significant terms in each analysis are shown here in rank order by p-value. Bars  
615 represent number of virus-induced RNAs mapping to each term.

616

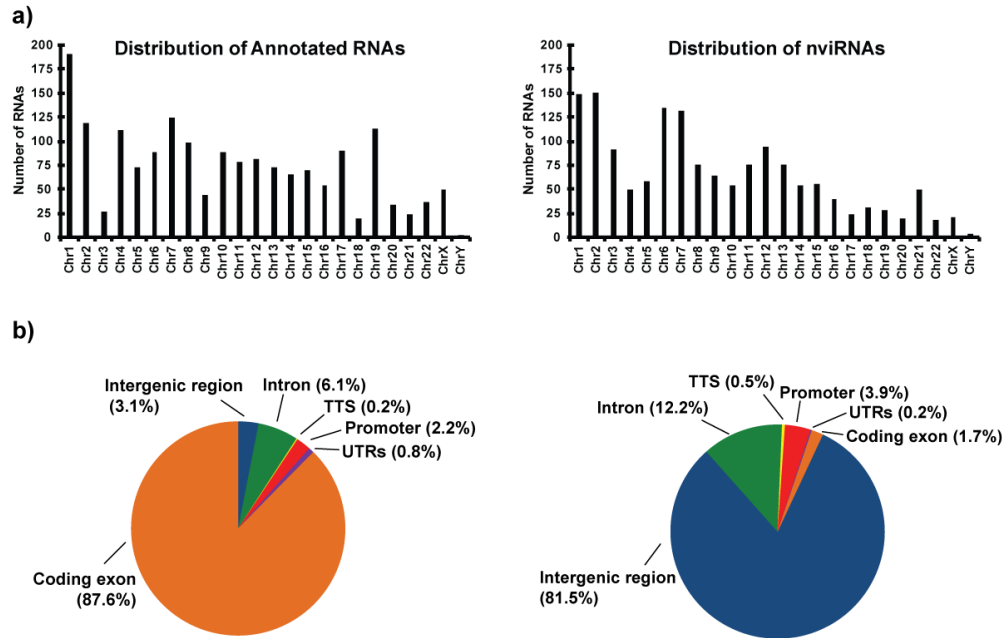

617

618 **Figure 3 - Comparison of genomic distribution of Sendai virus-induced**  
619 **previously-annotated RNAs and nviRNAs.**

620 a) Bar graphs represent the number of virus-induced previously-annotated RNAs (left)  
621 and nviRNAs (right) identified on each chromosome. b) Pie charts illustrate genomic  
622 feature distribution of previously RefSeq-annotated RNAs (left) and nviRNAs (right).  
623 RNAs are mapped to one of six annotation categories: promoters, transcriptional  
624 termination sites (TTS), exons, intergenic regions, introns, and untranslated regions  
625 (UTRs; includes 5' and 3' UTRs), with the percentage of sites corresponding to each  
626 category displayed in parentheses near the label.

627

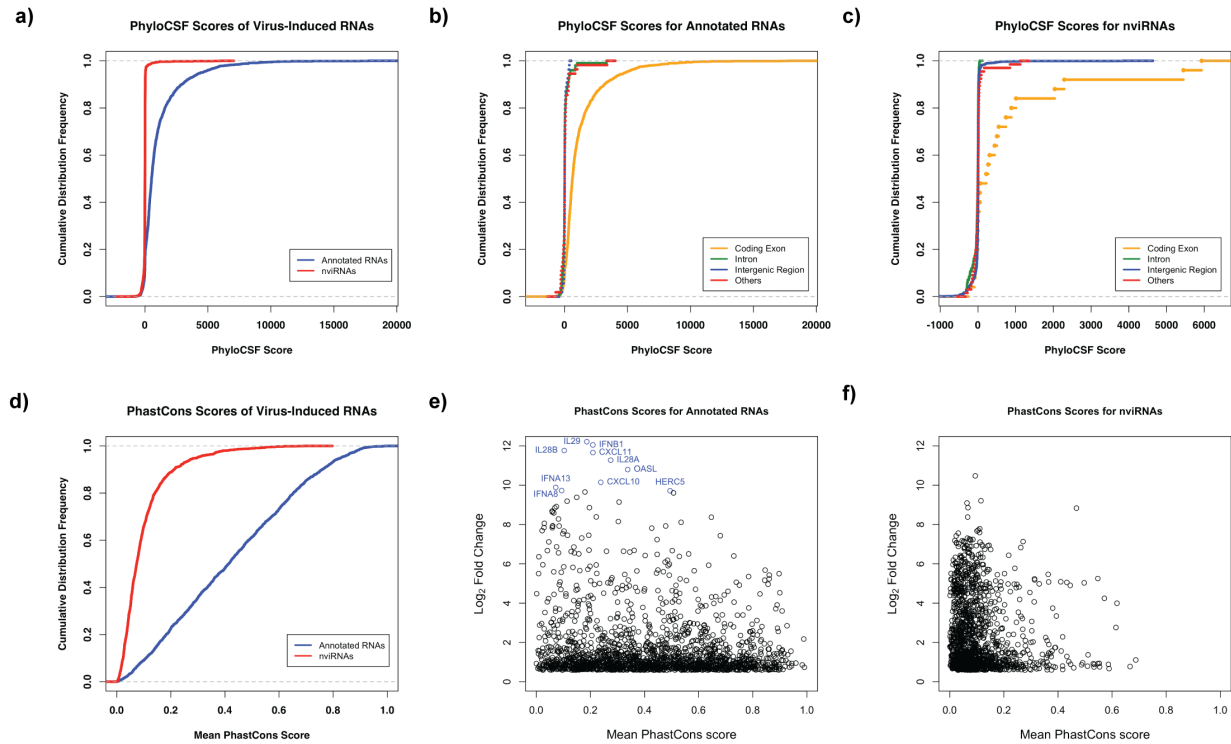

628

629 **Figure 4 - Comparison of protein coding potential and vertebrate sequence**

630 **conservation of Sendai virus-induced previously-annotated RNAs and nviRNAs.**

631 a) The cumulative distribution frequency of PhyloCSF scores for previously-annotated

632 RNAs (blue) and nviRNAs (red). b) The cumulative distribution frequency for RNAs

633 mapping to the different genomic feature annotations for previously RefSeq-annotated

634 RNAs and c) nviRNAs. The different genomic feature annotations include: coding

635 exons (orange), intergenic regions (blue), introns (green), and promoters, transcriptional

636 termination sites, and UTRs (all grouped together; red). d) The cumulative distribution

637 frequency of the mean PhastCons score for the previously-annotated RNAs (blue) and

638 nviRNAs (red). The mean PhastCons score for each RNA is plotted against the log<sub>2</sub>

639 fold change in expression after Sendai virus infection for e) previously-annotated RNAs

640 and f) nviRNAs. The 10 most highly-induced previously-annotated RNAs are labeled in

641 blue in e).

642

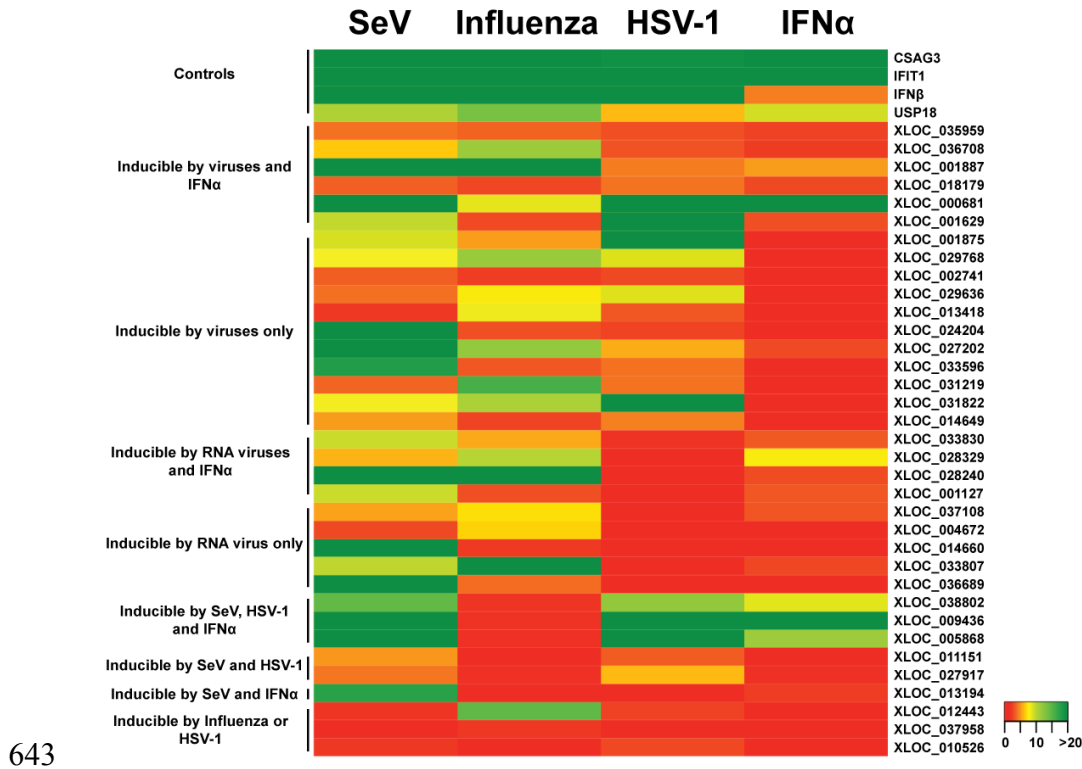

644 **Figure 5 - Classification of nviRNA expression in Namalwa cells from various**  
645 **stimuli.**

646 Total RNA from Namalwa cells infected with 5 pfu/cell for 10 hours of Sendai virus  
647 (SeV), influenza A virus, or HSV-1 or directly treated with 1000 U/mL of IFN $\alpha$  for 6 hours  
648 was analyzed by RT-qPCR. Heat map indicates expression of each RNA after infection  
649 or treatment with IFN $\alpha$ . Average values (n=3) of fold change are reported normalized to  
650 GAPDH expression.

651



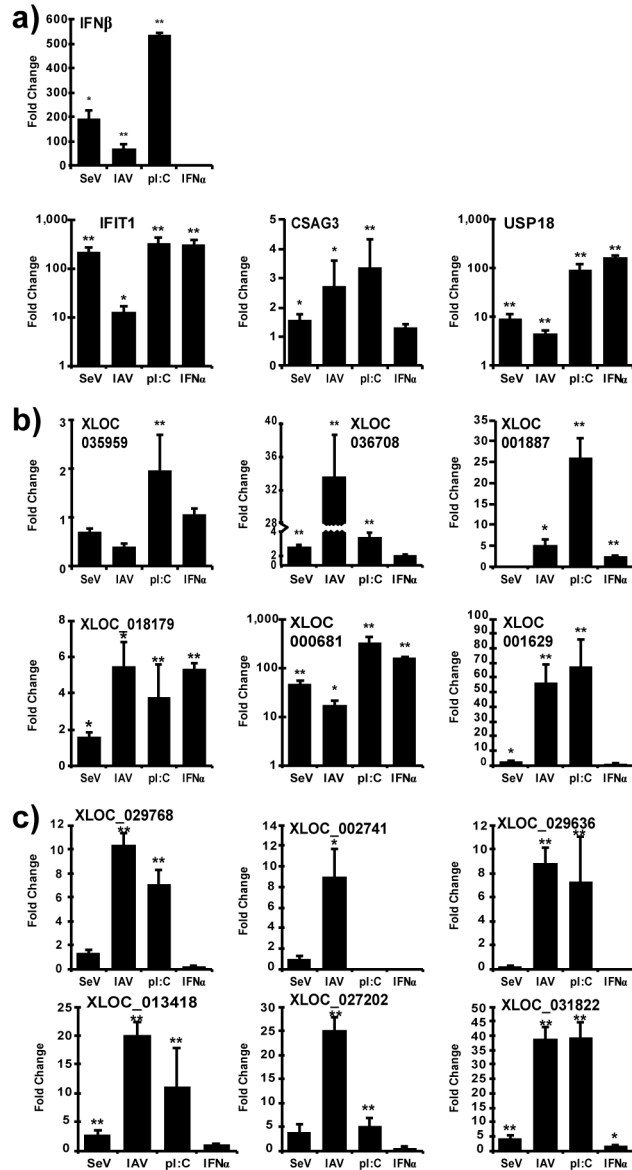

652

653 **Figure 6 - nviRNA expression in 2fTGH cells.**

654 Total RNA from 2fTGH cells infected with 5 pfu/cell Sendai virus (4 hours) or influenza A  
 655 virus (IAV; 10 hours), or transfected with synthetic dsRNA polyI:C (pl:C; 6 hours), or  
 656 directly treated with IFN $\alpha$  (6 hours) was analyzed by RT-qPCR. Gene-specific primers  
 657 were used for a) control genes, b) nviRNAs inducible by viruses and IFN $\alpha$  in Namalwa  
 658 cells and c) nviRNAs only inducible by viruses in Namalwa cells. Data is representative  
 659 of  $\geq 2$  replicate experiments and is shown normalized to GAPDH expression. Bars

660 indicate average values of technical replicates (n=3) with error bars representing  
661 standard deviation. Statistical analysis was done using a two-tailed Student's *t*-test (\* p-  
662 value < 0.05, \*\* p-value < 0.005).  
663

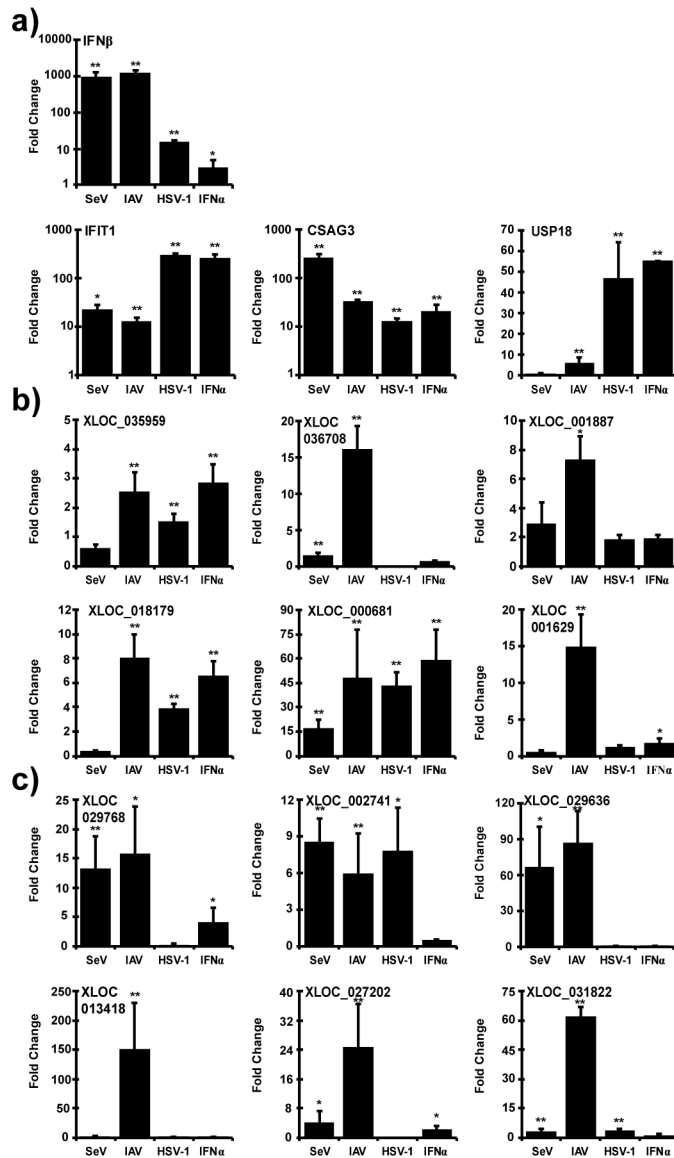

664

665 **Figure 7 - nviRNA expression in THP-1 cells.**

666 Total RNA from THP-1 cells infected with 5 pfu/cell Sendai virus (4 hours), influenza A  
667 virus (IAV; 10 hours) or HSV-1 (10 hours) or directly treated with IFN $\alpha$  (6 hours) was

668 analyzed by RT-qPCR. Gene-specific primers were used for a) control genes, b)  
669 nviRNAs inducible by viruses and IFN $\alpha$  in Namalwa cells and c) nviRNAs only inducible  
670 by viruses in Namalwa cells. Data is representative of  $\geq 2$  replicate experiments and is  
671 shown normalized to GAPDH expression. Bars indicate average values of technical  
672 replicates (n=3) with error bars representing standard deviation. Statistical analysis was  
673 done using a two-tailed Student's *t*-test (\* p-value < 0.05, \*\* p-value < 0.005).

674

675 **Table 1 – The top 10 highly virus-induced previously-annotated RNAs.**

| Gene            | Log <sub>2</sub> fold change | FDR       | PhastCons mean score |
|-----------------|------------------------------|-----------|----------------------|
| IL29            | 12.21 $\pm$ 0.41             | 3.34E-191 | 0.187                |
| IFN $\beta$     | 12.05 $\pm$ 0.37             | 9.06E-229 | 0.209                |
| IL28 $\beta$    | 11.77 $\pm$ 0.40             | 1.33E-186 | 0.103                |
| CXCL11          | 11.66 $\pm$ 0.34             | 7.83E-250 | 0.209                |
| IL28 $\alpha$   | 11.27 $\pm$ 0.42             | 3.42E-153 | 0.275                |
| OASL            | 10.80 $\pm$ 0.19             | 0.00E+00  | 0.338                |
| CXCL10          | 10.15 $\pm$ 0.13             | 1.39E-168 | 0.238                |
| IFN $\alpha$ 13 | 9.89 $\pm$ 0.45              | 0.00E+00  | 0.072                |
| IFN $\alpha$ 8  | 9.73 $\pm$ 0.45              | 1.17E-106 | 0.094                |
| HERC5           | 9.72 $\pm$ 0.38              | 4.91E-102 | 0.495                |

676

677 **Table 2 – Summary of nviRNA expression in various cell types.**

| RNA         | 2fTGH        |     |     |     | HeLa         |     |     |     |       | A549         |     |     |     | THP-1        |     |     |       |
|-------------|--------------|-----|-----|-----|--------------|-----|-----|-----|-------|--------------|-----|-----|-----|--------------|-----|-----|-------|
|             | IFN $\alpha$ | SeV | IAV | pIC | IFN $\alpha$ | SeV | IAV | pIC | HSV-1 | IFN $\alpha$ | SeV | IAV | pIC | IFN $\alpha$ | SeV | IAV | HSV-1 |
| CSAG3       | -            | -   | +   | +   | +            | +   | +   | +   | +     | +            | +   | +   | +   | +            | +   | +   | +     |
| IFIT1       | +            | +   | +   | +   | +            | +   | +   | +   | +     | +            | +   | +   | +   | +            | +   | +   | +     |
| IFN $\beta$ | -            | +   | +   | +   | +            | +   | +   | +   | +     | +            | +   | +   | +   | +            | +   | +   | +     |
| USP18       | +            | +   | +   | +   | +            | +   | -   | +   | +     | +            | +   | +   | +   | +            | -   | +   | +     |
| XLOC_035959 | -            | -   | -   | +   | +            | -   | -   | +   | -     | +            | -   | +   | +   | +            | -   | +   | -     |
| XLOC_036708 | -            | +   | +   | +   | -            | -   | +   | +   | +     | -            | -   | +   | +   | -            | -   | +   | -     |
| XLOC_001887 | +            | -   | +   | +   | -            | -   | -   | -   | -     | -            | -   | +   | +   | -            | -   | +   | -     |
| XLOC_018179 | +            | +   | +   | +   | -            | -   | -   | +   | -     | +            | -   | +   | +   | +            | -   | +   | +     |
| XLOC_000681 | +            | +   | +   | +   | +            | +   | +   | +   | +     | +            | +   | +   | +   | +            | +   | +   | +     |
| XLOC_001629 | -            | +   | +   | +   | +            | -   | +   | +   | +     | -            | +   | +   | +   | -            | -   | +   | -     |
| XLOC_001875 | -            | -   | -   | -   | -            | -   | -   | -   | -     | -            | -   | -   | -   | -            | -   | -   | -     |
| XLOC_029768 | -            | -   | +   | +   | +            | -   | +   | +   | +     | -            | -   | -   | -   | +            | +   | +   | -     |
| XLOC_002741 | -            | -   | +   | -   | +            | -   | +   | +   | -     | -            | -   | +   | +   | -            | +   | +   | +     |
| XLOC_029636 | -            | -   | +   | +   | -            | -   | -   | +   | -     | -            | +   | +   | +   | -            | +   | +   | -     |
| XLOC_013418 | -            | +   | +   | +   | -            | -   | +   | +   | +     | -            | -   | +   | +   | -            | -   | +   | -     |
| XLOC_024204 | -            | -   | -   | +   | -            | -   | -   | -   | -     | -            | -   | -   | -   | -            | -   | -   | -     |
| XLOC_027202 | -            | -   | +   | +   | +            | +   | +   | +   | -     | -            | +   | +   | +   | +            | +   | +   | -     |
| XLOC_033596 | -            | -   | -   | -   | -            | -   | -   | -   | -     | -            | -   | -   | -   | -            | +   | +   | +     |
| XLOC_031219 | -            | -   | +   | +   | -            | -   | -   | +   | -     | -            | -   | +   | +   | -            | -   | -   | -     |
| XLOC_031822 | +            | +   | +   | +   | +            | -   | +   | +   | +     | +            | +   | +   | +   | -            | +   | +   | +     |
| XLOC_014649 | -            | -   | -   | +   | -            | -   | -   | +   | -     | -            | -   | -   | -   | -            | -   | -   | -     |

678
